# Supplementary material for: Structure elucidation of the syringafactin lipopeptides provides insight in the evolution of nonribosomal peptide synthetases
Source: PubMed Central journal article supplement — Chem Sci. 2019 Dec 4;10(48):10979–90. doi: 10.1039/c9sc03633d (PMC7472662; doi:10.1039/c9sc03633d), 2019-12-04
Supplement: SC-010-C9SC03633D-s001.pdf [file SC-010-C9SC03633D-s001.pdf]

# Unravelling the Evolutionary Diversification Mechanism in Bacteria

Biosynthetic gene clusters (BGC) in bacteria diversify to produce a staggering array of natural products

Nonribosomal peptide synthetases (NRPSs)

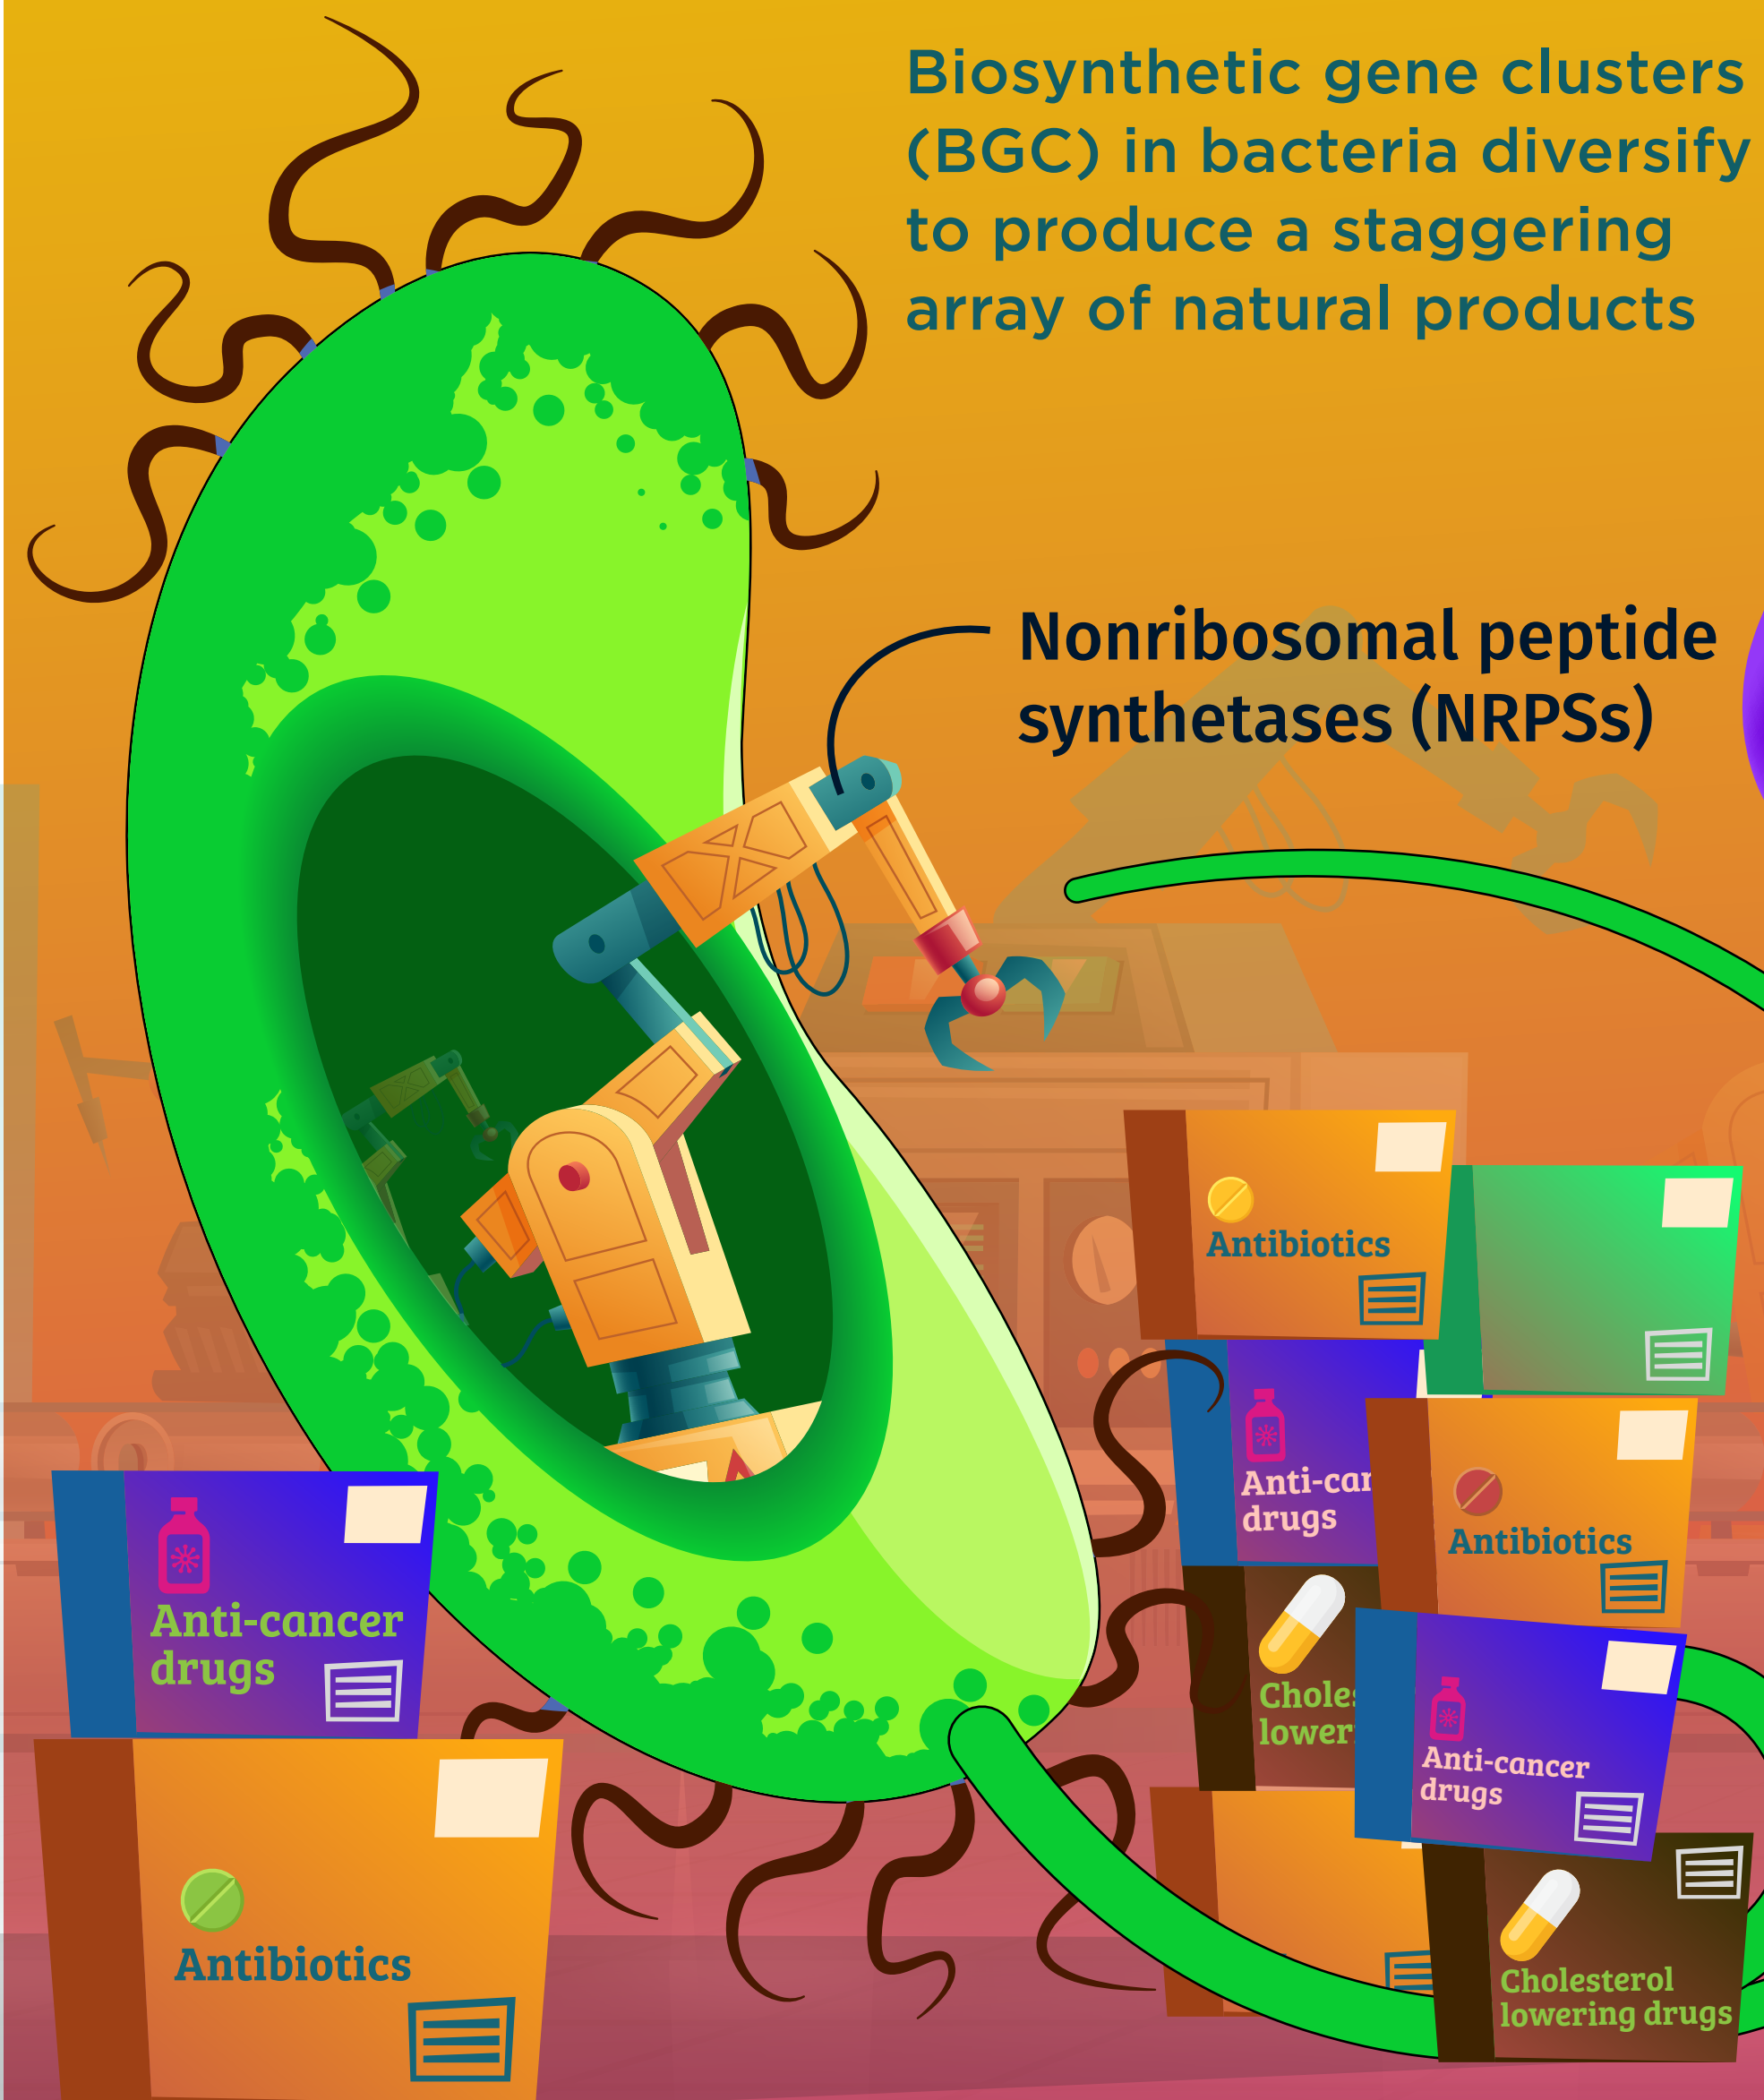

## What is the mechanism of this BGC diversification?

Computational analyses of the genes required for lipopeptide synthesis in *Pseudomonas* revealed an evolutionary snapshot of the BGC diversification process

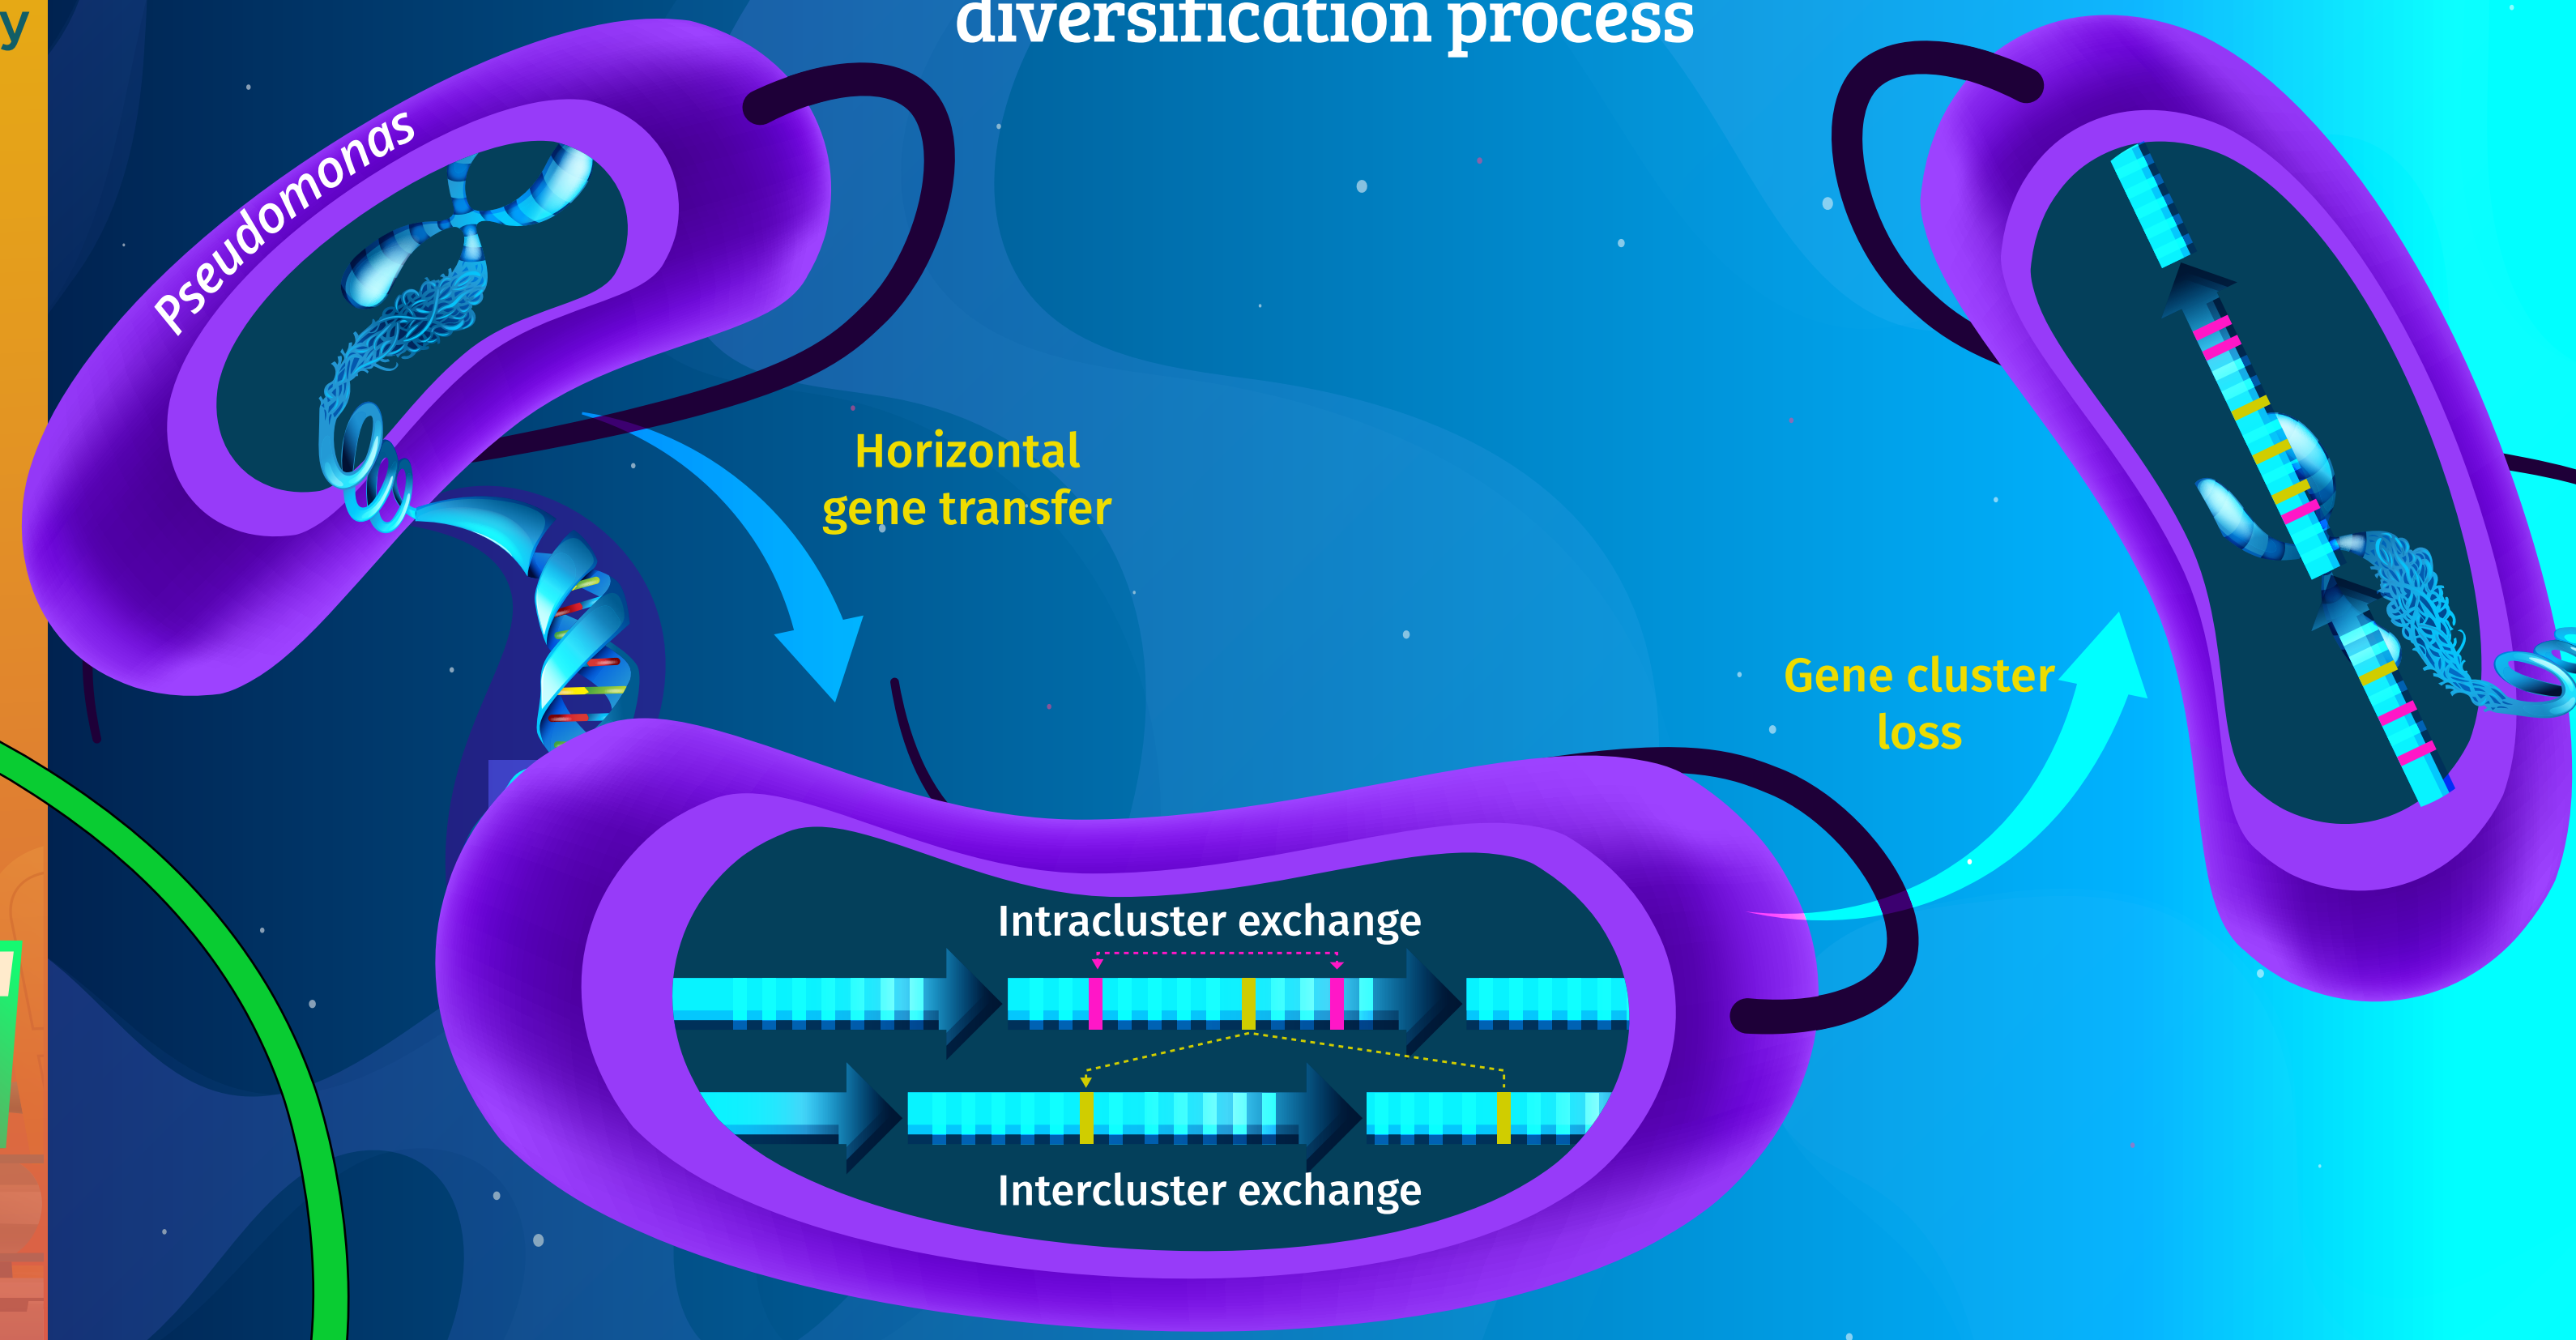

**Intra and intercluster exchange creates chemical diversity in bacteria that may be exploited for therapeutic use**
